# Supplementary material
Source: PubMed Central journal article supplement (PMC4173161)
Supplement: amiajnl-2012-001548-s1.pdf [file amiajnl-2012-001548-s1.pdf]

### A. How to compute SUS score:

According to Brooke [26]: “To calculate the SUS score, first sum the score contributions from each item. Each item’s score contribution will range from 0 to 4. For items 1, 3, 5, 7, and 9 the score contribution is the scale position minus 1. For items 2, 4, 6, 8 and 10, the contribution is 5 minus the scale position. Multiply the sum of the scores by 2.5 to obtain the overall value of SU.”

### B. Interpretation of SUS scores:

According to Bangor et al.[27], the SUS score can be interpreted, in terms of usability, as follow:

- Around 25/100 ⇔ “worst imaginable”
- Around 38/100 ⇔ “poor”
- Around 52/100 ⇔ “OK”
- Around 73/100 ⇔ “good”
- Around 85/100 ⇔ “excellent”
- Around 100/100 ⇔ “best imaginable”

### C. Detailed results of SUS:

The following graphics summarize SUS results for each question:

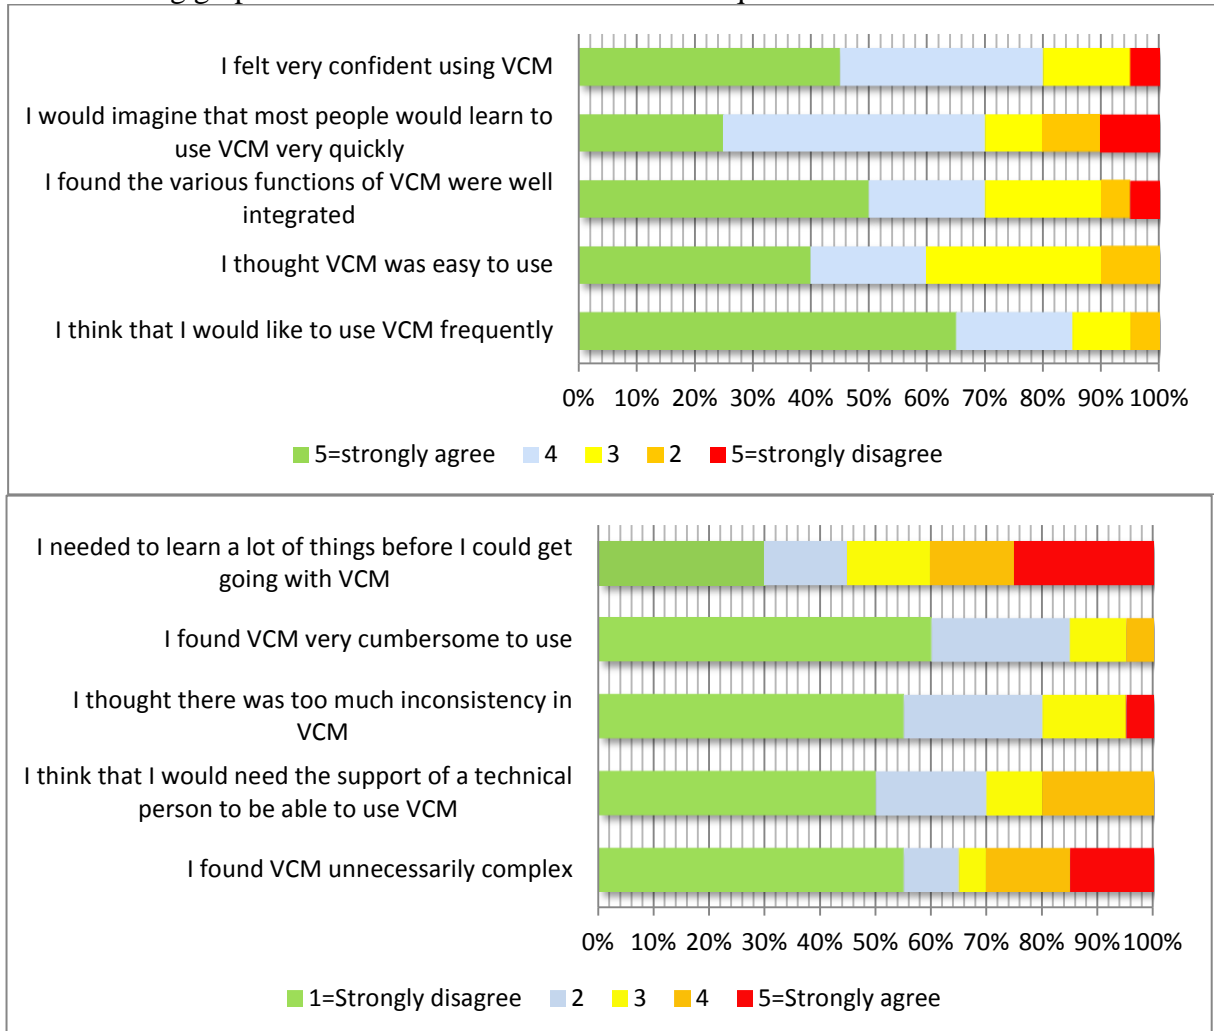

### D. Clinical scenarios:

- 1) You follow a 60 years old patient who is treated for hypertension and suffers from abdominal obesity. The lipid panel shows: high triglycerides, low HDL cholesterol and low LDD cholesterol (<1g/l). You wonder how to treat this dyslipidemia. You go on CISMef BP website and ask for “dyslipidemia” to find the guidelines.

- 2) You are thinking about introducing corticoids for your 22 months old asthmatic patient. You go on CISMef BP website and ask for “asthma” in order to find the correct dosage for your patient.
- 3) You diagnose your pregnant patient with a urinary tract infection. You go to the CISMef-BP website and search for “Urinary tract infections” in Doc’CISMef to find available treatment options.
- 4) You have treated your old patient for a urinary tract infection with antibiotics. Two weeks after, he comes back with symptoms for bacterial pneumonia. There is no health status anomaly. You go on CISMef BP website and ask for “pneumonia antibiotics” in order to find available treatment option

### E. Scenario-specific results:

| VCM        | Asthma |         | Dyslipidemia |         | Urinary tract infection |         | Pneumonia |         |
|------------|--------|---------|--------------|---------|-------------------------|---------|-----------|---------|
|            | With   | Without | With         | Without | With                    | Without | With      | Without |
| Successful | 10     | 8       | 10           | 6       | 9                       | 9       | 10        | 9       |
| failed     | 0      | 2       | 0            | 4       | 1                       | 1       | 0         | 1       |

### F. Minor uncorrected ergonomic issues:

|    |                                                                                           |
|----|-------------------------------------------------------------------------------------------|
| 1  | Misalignment of icons                                                                     |
| 2  | Poor delimitation of VCM filter                                                           |
| 3  | Misalignments of lines between VCM filter columns                                         |
| 4  | Icons labels are truncated                                                                |
| 5  | All VCM icons have the same weight                                                        |
| 6  | Some icons with hyperlink (to refine queries), some without                               |
| 7  | It is hard to understand the function of VCM icon in resource index                       |
| 8  | Heterogeneity between faceted filter and VCM filter whereas it is the same function       |
| 9  | Rare, but sometimes, VCM filter acts weirdly (do not filter on the selected icons)        |
| 10 | Using icons hyperlink open a windows which is quite different (use another version of DC) |
| 11 | Results are not always presented in the same way                                          |
| 12 | Some resources do not have any VCM icons                                                  |
| 13 | Discrepancies between icon label and tooltip label : same terms, different position       |
